# Supplementary material for: Large scale preparation of graphene quantum dots from graphite oxide in pure water via one-step electrochemical tailoring
Source: Royal Society of Chemistry journal article supplement (doi:10.1039/c4ra16805d), 2015-01-01
Supplement: c4ra16805d1.pdf [file c4ra16805d1.pdf]

## Supporting Information

### Large Scale Preparation of Graphene Quantum Dots from Graphite Oxide in Pure Water via a One-step Electrochemical Tailoring

Jianhui Deng, Qiuju Lu, Haitao Li, Youyu Zhang\* and Shouzuo Yao

*Key Laboratory of Chemical Biology and Traditional Chinese Medicine Research (Ministry of Education), College of Chemistry and Chemical Engineering, Hunan Normal University, Changsha 410081, PR China*

\*Corresponding author. Tel: +86-731-8865515; fax: +86-731-8865515;  
E-mail address: zhangyy@hunnu.edu.cn

#### Apparatus and reagents

A PS-305DM constant-current supply (LongWei Instrument Co., LTD, HK) was used for synthesis of GQD. F-4500 Fluorescence spectrophotometer (Hitachi Co. Japan) was used to collect the fluorescence spectra. The ultraviolet-visible (UV-Vis) spectra were obtained by a UV-2450 UV-Vis spectrophotometer (Shimazu Co., Japan). Transmission electron microscopy (TEM) images were collected on a JEOL-1230 transmission electronic microscope (JEOL, Japan). Graphite oxide (JCNANO Co., China) was saved as carbon source. All other chemicals were of analytical grade. Milli-Q ultrapure water (Milli-pore,  $\geq 18 \text{ M}\Omega \cdot \text{cm}$ ) was used throughout.

#### Experimental section

**GQD Synthesis:** 1.0 g GO powder was dispersed in 100 mL water. Two Pt sheets ( $4 \times 4 \text{ cm}^2$ ) were saved as anode and cathode, which was fixed with a rubber plug to keep the distance between the two Pt sheets constant (3 cm). The constant voltage mode was used (15 V), and the synthesization current intensity varied in range of 50-30 mA/cm<sup>2</sup>. Reacting for about 4 h at a suitable potential untill the black solution changed into dark-brown. As obtained solution was centrifuged (10000 r/min) to remove the non-luminescence fraction with large size. Then dialyzed by dialysis bags (retained molecular weight: 7000, 3500 and 1000 Da) to obtained GQD<sub>purple-blue</sub>, GQD<sub>blue</sub> and GQD<sub>green</sub>. The fraction of 1000-3500 Da for GQD<sub>purple-blue</sub>, fraction of 3500-7000 Da for GQD<sub>blue</sub> and fraction  $>7000 \text{ Da}$  for GQD<sub>green</sub>.

### The procedure for the determination of the fluorescence quantum yields:

Fluorescence (FL) quantum yields of the C-dots were obtained by using the comparative method of Williams et al.<sup>1</sup> The quantum yield of GQD,  $\Phi_x$ , is calculated according to the following equation:

$$\Phi_x = \Phi_{\text{std}} \left( \frac{F_x}{F_{\text{std}}} \right) \left( \frac{A_{\text{std}}}{A_x} \right) \left( \frac{n_x}{n_{\text{std}}} \right)^2$$

Where  $\Phi$ ,  $F$ ,  $A$ , and  $n$  are quantum yield of the standard sample, integrated photoluminescence intensity, absorbance, and refractive index, respectively. The subscript “std” refers to the standard fluorophore of known quantum yield, for an example, quinine sulfate used in present work. To minimize re-absorption effects, the absorbance of GQD and quinine sulfate solution in the 10 mm fluorescence cuvette were adjusted never exceed 0.1 at the excitation wavelength. The quinine sulfate was dissolved in 0.1 M  $\text{H}_2\text{SO}_4$  ( $n_{\text{std}}$  was 1.33). The maximum excitation wavelengths of GQD and quinine sulfate solution are at ~390 nm and ~350 nm, respectively. We choose 360 nm as moderate excitation wavelength. The quantum yield of quinine bisulfate dissolved in 0.1 M  $\text{H}_2\text{SO}_4$  is 0.54 reported in literature.<sup>2</sup> QY of as-prepared GQD was calculated according to the formulae above and summarized in Table S1

**Detection of  $\text{H}_2\text{O}_2$  and glucose:** In  $\text{H}_2\text{O}_2$  assay, GQD dispersed by NaAc buffer with a concentration of 50  $\mu\text{g}/\text{mL}$ . 50  $\mu\text{L}$  of GQD solution was added into 850  $\mu\text{L}$  of NaAc buffer solution (pH: 4.0), followed by adding 50  $\mu\text{L}$  of TMB solution (10 mg/mL in ethanol), then 50  $\mu\text{L}$  NaAc buffer containing  $\text{H}_2\text{O}_2$  with different concentration was added, then kept in 35  $^\circ\text{C}$  bath for 30 min before absorbance measurement. In glucose assay, 100  $\mu\text{L}$  of 1 mg/mL GOx and 100  $\mu\text{L}$  glucose of different concentrations in 200  $\mu\text{L}$  phosphate buffer (PBS, 0.1 M, pH=7.0) were incubated at 37  $^\circ\text{C}$  for 30 min; 50  $\mu\text{L}$  of TMB, 50  $\mu\text{L}$  of GQD dispersion, and 800  $\mu\text{L}$  of NaAc solution were added into 200  $\mu\text{L}$  above glucose reaction solution; the mixed solution was incubated at 35  $^\circ\text{C}$  for 30 min and then for standard curve measurement. Repeat three times.

Table S1. QY of different GQDs.

| sample                     | QY(%)      |
|----------------------------|------------|
| GQD <sub>purple-blue</sub> | 7.8 ± 0.86 |
| GQD <sub>blue</sub>        | 5.9 ± 1.20 |
| GQD <sub>green</sub>       | 3.1 ± 1.54 |

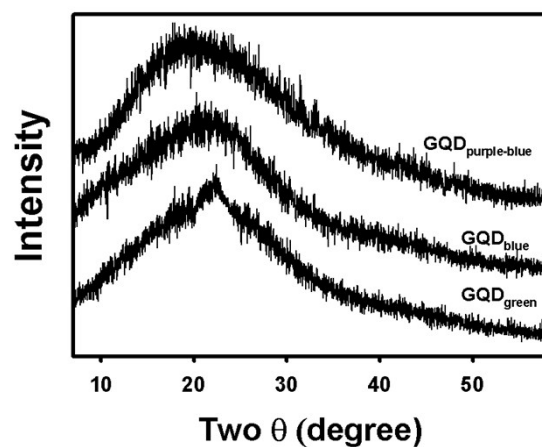

Figure S1 The typical X-ray diffraction (XRD) patterns of different GQDs.

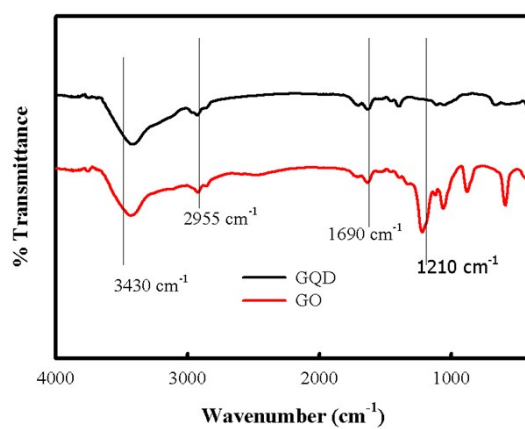

Figure S2 The FTIR spectra of GQD (black) and GO (red).

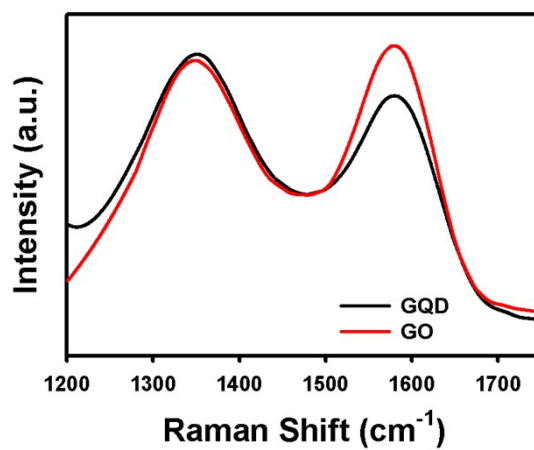

Figure S3 The Raman spectra of GQD (black) and GO (red).

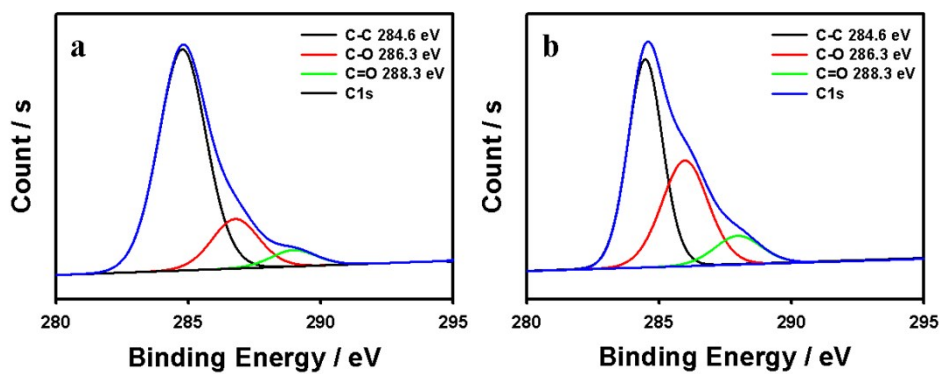

**Figure S4** The XPS spectra of GO (a) and GQD (b).

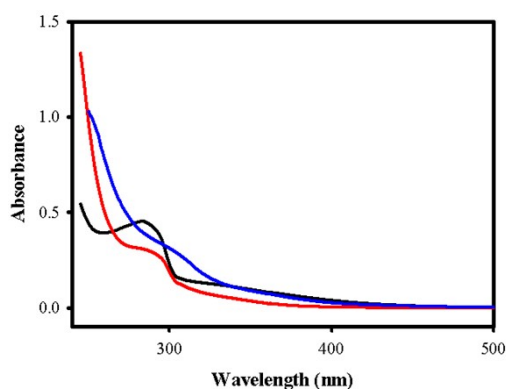

**Figure S5** Absorbance of GQD<sub>purple-blue</sub> (black), GQD<sub>blue</sub> (blue) and GQD<sub>green</sub> (red), respectively.

The concentration of GQDs were 50  $\mu\text{g/mL}$  in water.

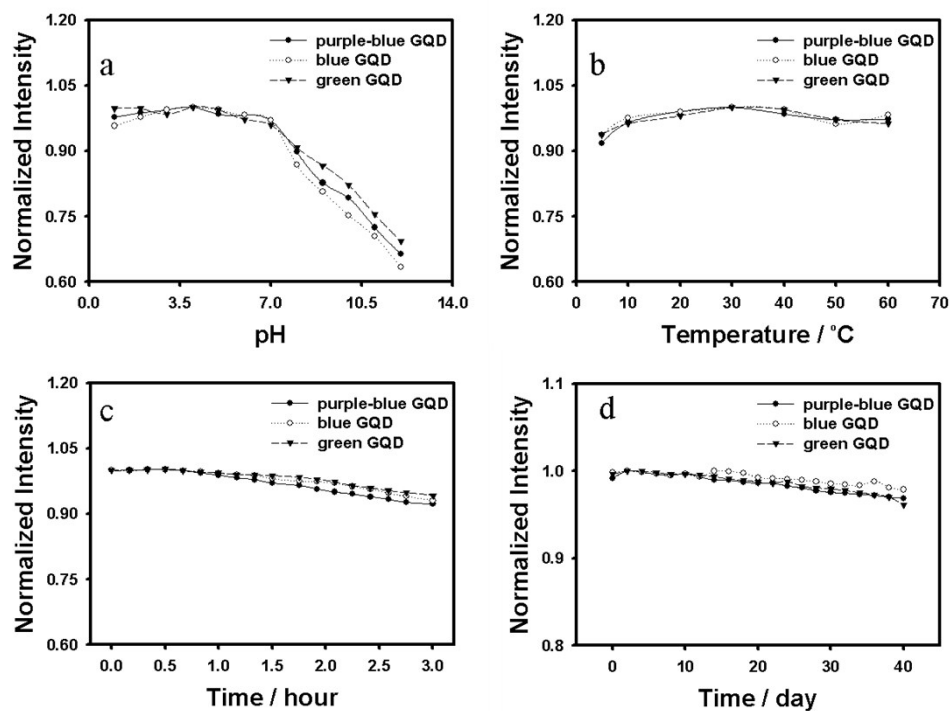

**Figure S6** (a) The effect of pH value for the normalized FL intensity of different GQD solutions. (b) The normalized FL intensity of different GQD solutions at different temperature. The pH value was adjusted by 0.1 M  $\text{H}_2\text{SO}_4$  and 0.1 M NaOH. The different GQD solutions were kept in room temperature. (c) Normalized emission intensity of different GQD solution during continuous excitation at 380, 400 and 420 nm. (d) The changes of normalized FL intensity of different GQD solution within a month.

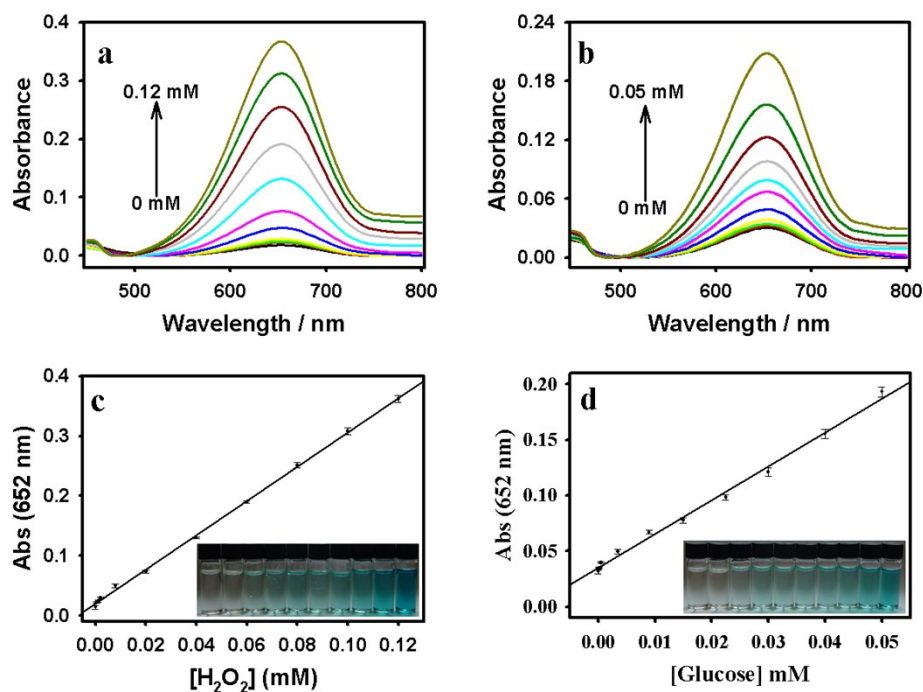

**Figure S7** The absorbance spectra of TMB+GQD+H<sub>2</sub>O<sub>2</sub> (a) and TMB+GQD+GOx+glucose (b) system with analyte of different concentration. Response curves of H<sub>2</sub>O<sub>2</sub> (c) and glucose (d), respectively. Inset: images of production of colored products for different concentrations of H<sub>2</sub>O<sub>2</sub> and glucose. The pH of NaAc buffer was 4.0. GQD of 2.5 μg/mL was used here. TMB was 0.5 mg/mL.

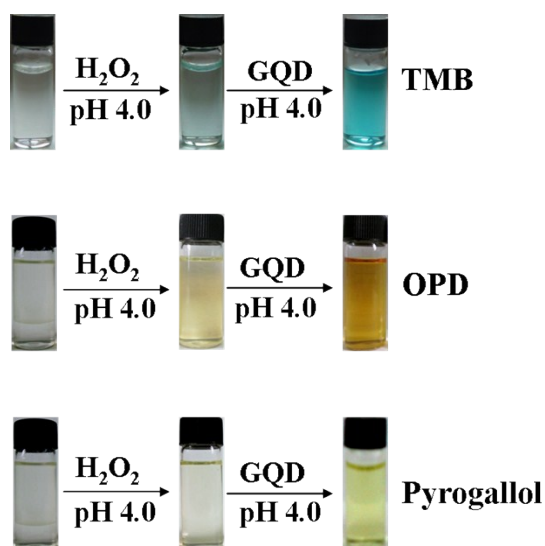

**Figure S8** Images of oxidation color reaction of TMB, OPD, and pyrogallol by H<sub>2</sub>O<sub>2</sub> after catalyzing by GQD at pH 4.0 NaAc buffer solution.

## Reference

1. A. T. R. Williams, S. A. Winfield and J. N. Miller, *Analyst*, 1983, **108**, 1067-1071.
2. J. Deng, Q. Lu, N. Mi, H. Li, M. Liu, M. Xu, L. Tan, Q. Xie, Y. Zhang and S. Yao, *Chemistry – A European Journal*, 2014, **20**, 4993-4999.
